# Supplementary material for: Machine Learning-Based Identification of Mating Type and Metalaxyl Response in Phytophthora infestans Using SSR Markers
Source: MDPI journal article supplement (doi:10.3390/microorganisms12050982), 2024-05-14

**Figure S1. Metalaxyl response and mating type accuracy for the different machine learning models using common SSR marker alleles**

**Metalaxyl Response: Random Forest**

Prediction accuracy.

(a). Training Set: 98.61 %

(b). Test Set: 74.19 %

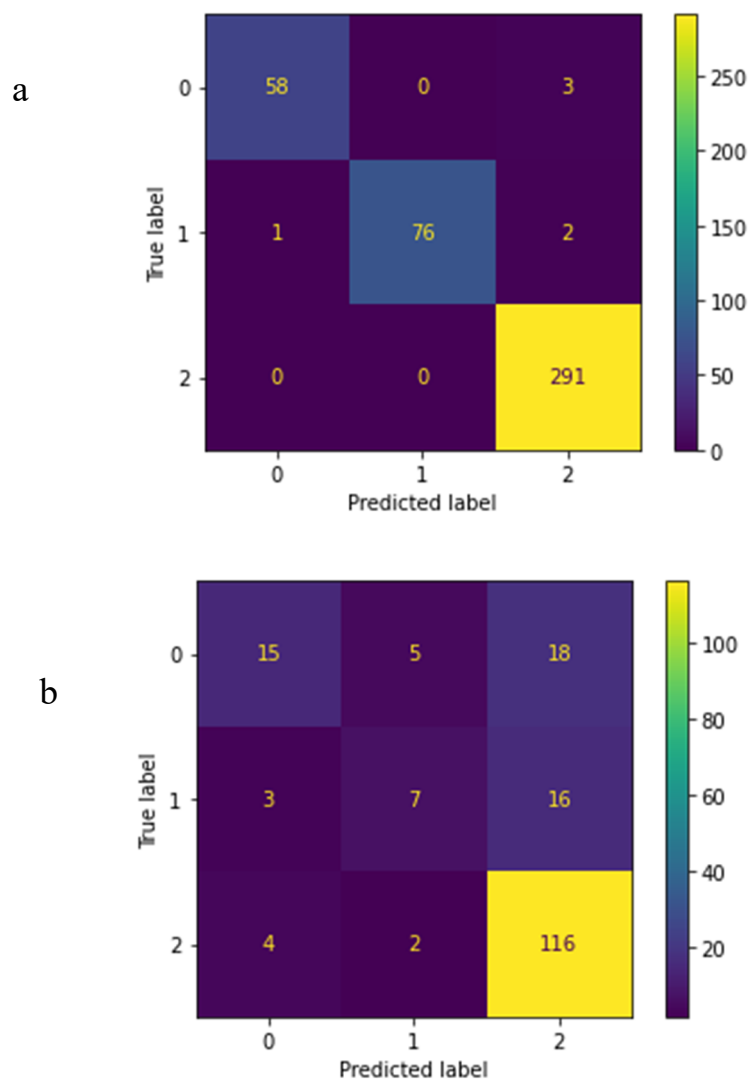

## Metalaxyl Response: Decision tree

Prediction accuracy.

(a). Training Set: 75.17 %

(b). Test Set: 72.04 %

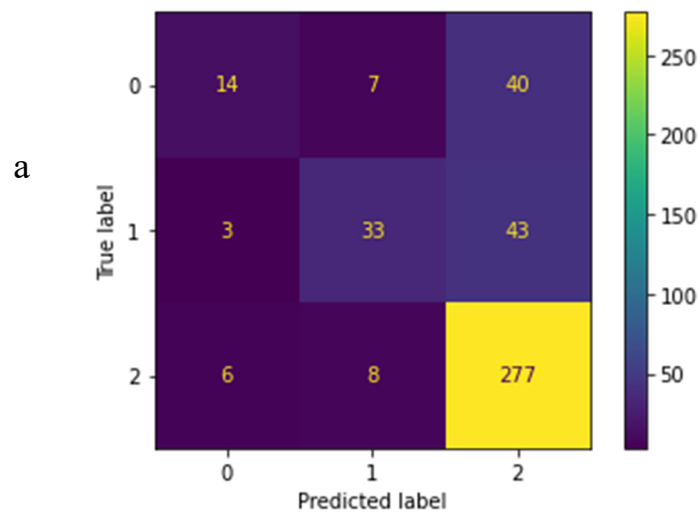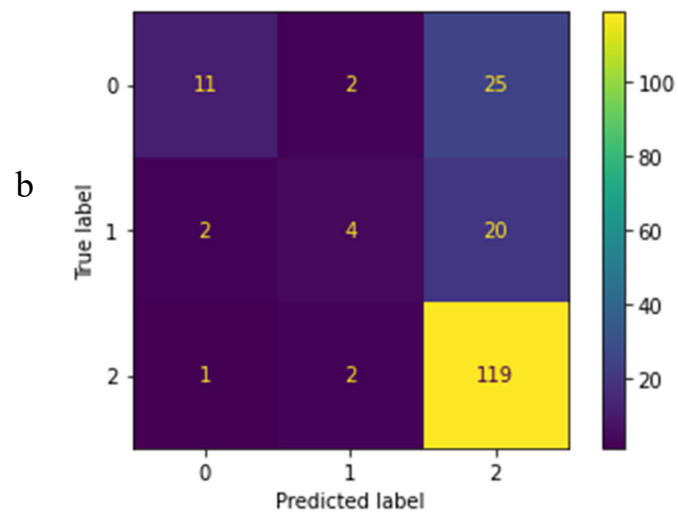

## Metalaxyl Response: Support vector machine

Prediction accuracy.

(a). Training Set: 83.29 %

(b). Test Set: 73.66 %

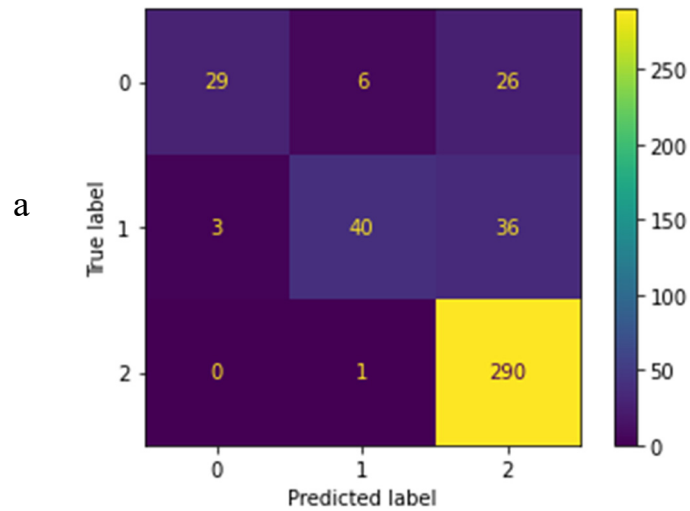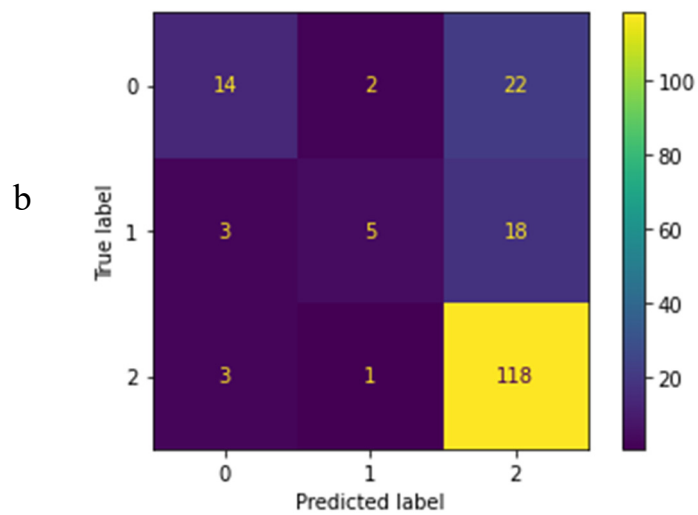

## Metalaxyl Response: Artificial neural network

Prediction accuracy.

(a). Training Set: 75.87%

(b). Test Set: 63.44%

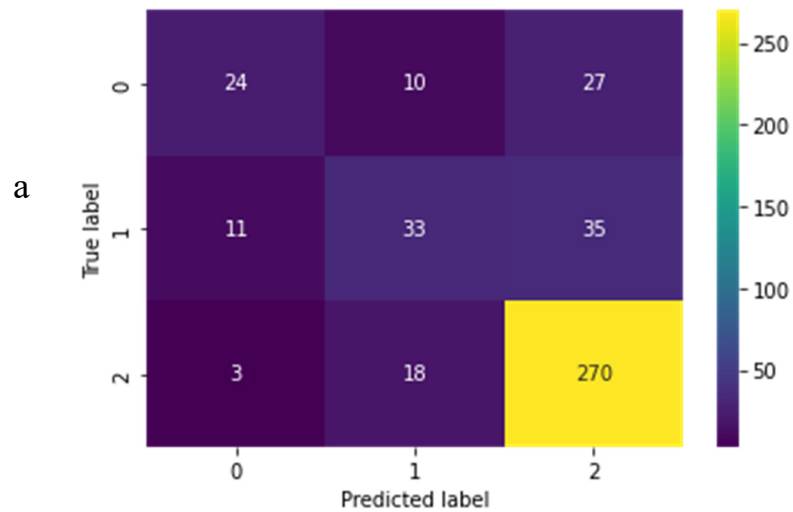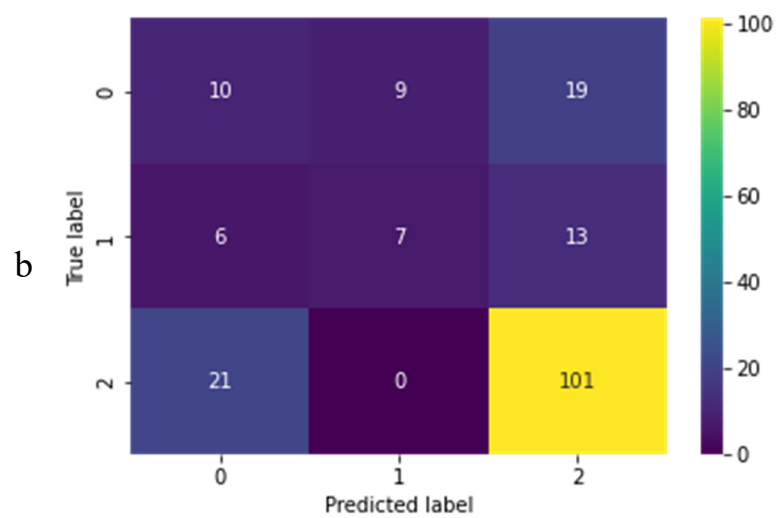

### Mating type: Random Forest

Prediction accuracy.

(a). Training Set: 98.41 %

(b). Test Set: 75.66 %

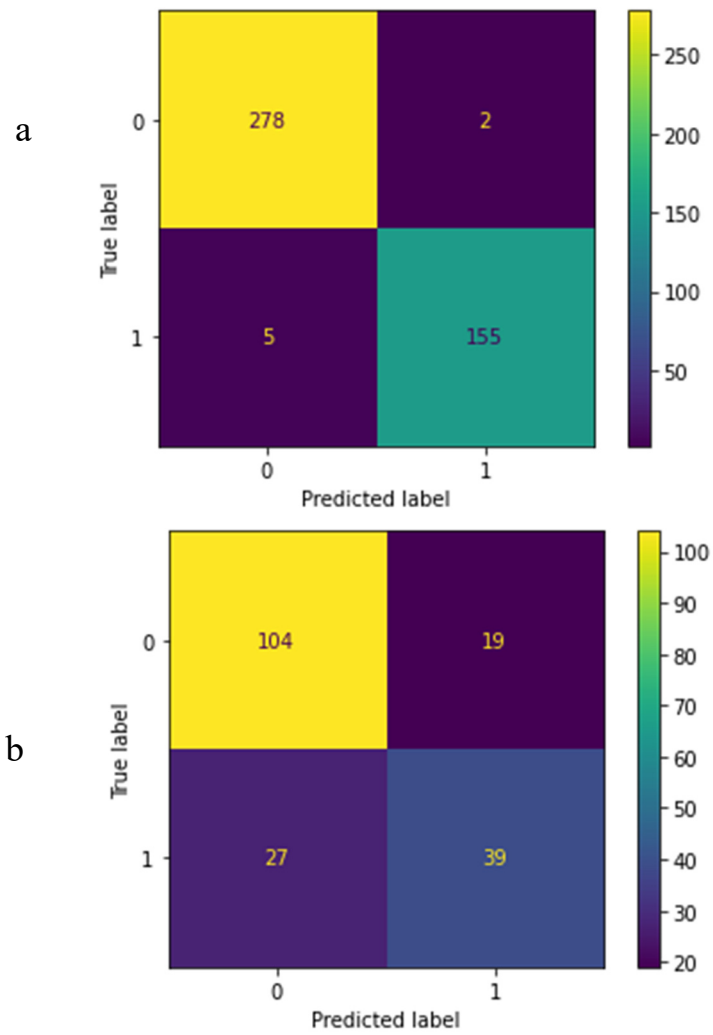

**Mating type: Decision tree**

Prediction accuracy.

(a). Training Set: 76.59 %

(b). Test Set: 67.2 %

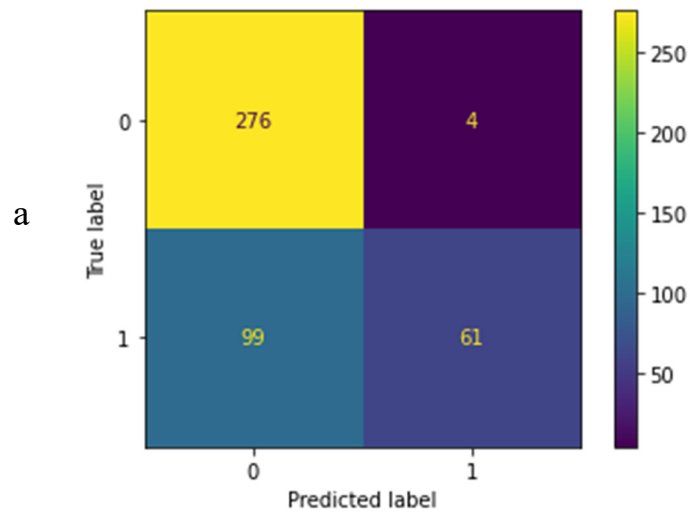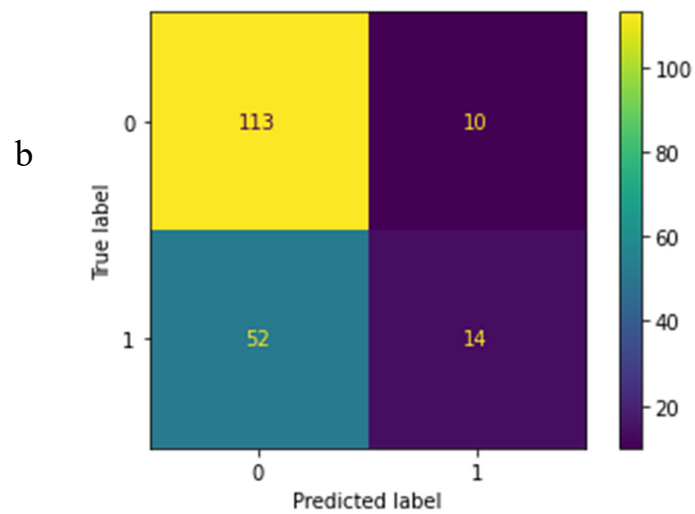

## Mating type: Support vector machine

Prediction accuracy.

(a). Training Set: 89.09 %

(b). Test Set: 67.72 %

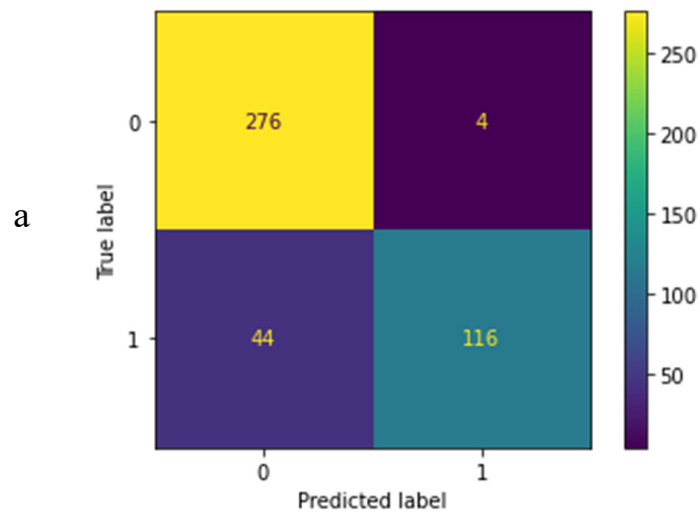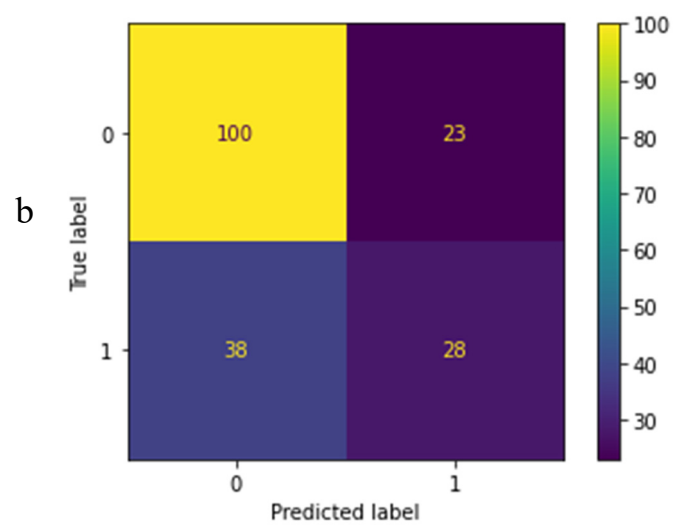

### Mating type: Artificial neural network

Prediction accuracy.

(a). Training Set: 73.41 %

(b). Test Set: 64.55 %

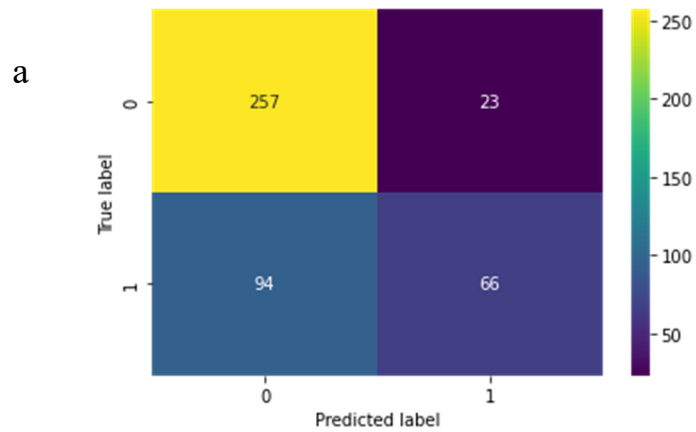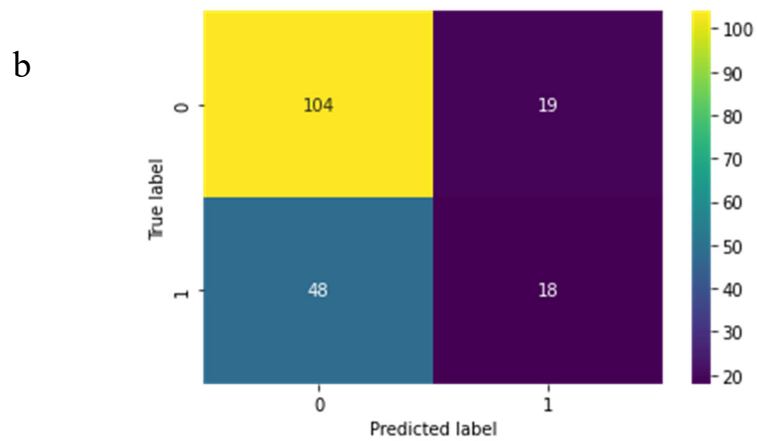

Supplement: s1 [file s1]
