# Supplementary material for: Machine Learning-Based Identification of Mating Type and Metalaxyl Response in Phytophthora infestans Using SSR Markers
Source: Microorganisms. 2024 May 14;12(5):982. doi: 10.3390/microorganisms12050982 (PMC11124124; doi:10.3390/microorganisms12050982)
Supplement: Supplementary file 1 [file microorganisms-12-00982-s001.zip › Table S1.csv]

Changes in allele frequency of SSR marker alleles of P. infestans isolates, for common and all alleles across populations for mating type and metalaxyl response
A. Mating type
	D13.136	D13.142	D13.140	D13.132	D13.158	D13.156	D13.138	D13.154	D13.118	D13.134	D13.152	D13.122	D13.150	D13.148	D13.162	G11.154	G11.160	G11.162	G11.156	G11.204	G11.206	G11.166	G11.210	G11.142	G11.198	G11.140	G11.148	G11.164	G11.158	G11.200	G11.208	G11.202	G11.168	G11.152	G11.222	G11.150	Pi04.166	Pi04.170	Pi04.168	Pi04.160	Pi04.164	Pi4B.213	Pi4B.217	Pi4B.205	Pi4B.215	Pi4B.209	Pi4B.211	Pi4B.221	Pi63.279
Estonia	0.833333333	0.029411765	0.049019608	0.029411765	0.019607843	0.019607843	0.019607843	0	0	0	0	0	0	0	0	0.155844156	0.194805195	0.24025974	0.292207792	0.006493506	0.084415584	0.012987013	0.012987013	0	0	0	0	0	0	0	0	0	0	0	0	0	0.343373494	0.361445783	0.295180723	0	0	0.259036145	0.331325301	0.403614458	0.006024096	0	0	0	0.554216867
Pskov_region	0.666666667	0	0.097222222	0	0.027777778	0	0.027777778	0.111111111	0.027777778	0.027777778	0.013888889	0	0	0	0	0.133928571	0.080357143	0.223214286	0.169642857	0.035714286	0.133928571	0.008928571	0	0.214285714	0	0	0	0	0	0	0	0	0	0	0	0	0.36440678	0.36440678	0.271186441	0	0	0.271186441	0.36440678	0.36440678	0	0	0	0	0.533898305
Poland	0.339464883	0.001672241	0.010033445	0.013377926	0.02173913	0.056856187	0.015050167	0.222408027	0.157190635	0.115384615	0.013377926	0.023411371	0.001672241	0.001672241	0.006688963	0.064977974	0.101321586	0.263215859	0.245594714	0	0.002202643	0	0.002202643	0.038546256	0.127753304	0.055066079	0.016519824	0.017621145	0.028634361	0.004405286	0.003303965	0.019823789	0.001101322	0.003303965	0.003303965	0.001101322	0.202380952	0.399350649	0.123376623	0.273809524	0.001082251	0.223849372	0.404811715	0.35460251	0	0.008368201	0.007322176	0.001046025	0.145962733
B. Metalaxyl response
	D13.136	D13.140	D13.154	D13.118	D13.138	D13.134	D13.152	D13.158	D13.156	D13.132	D13.142	D13.162	D13.150	D13.148	D13.122	G11.162	G11.206	G11.154	G11.160	G11.142	G11.156	G11.204	G11.166	G11.210	G11.140	G11.198	G11.158	G11.164	G11.152	G11.148	G11.202	G11.200	G11.222	G11.150	G11.208	G11.168	Pi04.166	Pi04.170	Pi04.168	Pi04.160	Pi04.164	Pi4B.217	Pi4B.205	Pi4B.213	Pi4B.215	Pi4B.211	Pi4B.221	Pi4B.209	Pi63.279
Estonia	0.666666667	0.097222222	0.111111111	0.027777778	0.027777778	0.027777778	0.013888889	0.027777778	0	0	0	0	0	0	0	0.223214286	0.133928571	0.133928571	0.080357143	0.214285714	0.169642857	0.035714286	0.008928571	0	0	0	0	0	0	0	0	0	0	0	0	0	0.36440678	0.36440678	0.271186441	0	0	0.36440678	0.36440678	0.271186441	0	0	0	0	0.533898305
Pskov_region	0.847826087	0.043478261	0	0	0.02173913	0	0	0	0.02173913	0.032608696	0.032608696	0	0	0	0	0.231343284	0.097014925	0.171641791	0.186567164	0	0.276119403	0.007462687	0.014925373	0.014925373	0	0	0	0	0	0	0	0	0	0	0	0	0.342465753	0.363013699	0.294520548	0	0	0.335616438	0.383561644	0.273972603	0.006849315	0	0	0	0.54109589
Poland	0.338383838	0.01010101	0.218855219	0.15993266	0.015151515	0.116161616	0.013468013	0.021885522	0.057239057	0.013468013	0.001683502	0.006734007	0.001683502	0.001683502	0.023569024	0.262114537	0.002202643	0.064977974	0.101321586	0.039647577	0.246696035	0	0	0.002202643	0.055066079	0.126651982	0.028634361	0.017621145	0.003303965	0.016519824	0.019823789	0.004405286	0.003303965	0.001101322	0.003303965	0.001101322	0.201086957	0.398913043	0.122826087	0.276086957	0.001086957	0.404811715	0.353556485	0.224895397	0	0.007322176	0.001046025	0.008368201	0.145530146
[truncated: 56 more columns]
